# Supplementary material for: “Where’s My Mentor?!” Characterizing Negative Mentoring Experiences in Undergraduate Life Science Research
Source: Atypon-hosted journal article supplement (doi:10.1187/cbe.19-02-0036), 2019-11-22
Supplement: combinedsupmats.pdf [file combinedsupmats.pdf]

# Supplemental Material

*CBE—Life Sciences Education*

Limeri *et al.*

Supplemental Online Materials for  
*“Where’s my mentor?!” Characterizing negative mentoring in undergraduate research*

Lisa B. Limeri, Muhammad Zaka Asif, Benjamin H.T. Bridges, David Esparza, Trevor T. Tuma, Daquan Sanders, Alexander J. Morrison, Pallavi Rao, Joseph A. Harsh, Adam V. Maltese, Erin L. Dolan\*

\*Corresponding author. Email: [eldolan@uga.edu](mailto:eldolan@uga.edu)

**Screening survey questions**

Participants were asked to rate the quality of mentoring they experienced during undergraduate research and describe their rating as follows:

1. We are interested in the quality of mentoring that students experience during undergraduate research. As a whole, how would you rate the mentoring you received during your research experience? A rating of -5 is extremely negative or unfavorable, 0 is neutral, and +5 is extremely positive or favorable.

|                      | -5                    | -4                    | -3                    | -2                    | -1                    | 0                     | 1                     | 2                     | 3                     | 4                     | 5                     |
|----------------------|-----------------------|-----------------------|-----------------------|-----------------------|-----------------------|-----------------------|-----------------------|-----------------------|-----------------------|-----------------------|-----------------------|
| Mentoring Experience | <input type="radio"/> |

2. Please describe your rating. What factors or experiences prompted you to select this rating? (constructed response)

**Interview guide**

The following questions were asked during semi-structured interviews conducted in this study. The questions were designed to elucidate mentoring behaviors, characteristics, or events that prompted undergraduate researchers to view their mentoring experiences less favorably and to elicit the undergraduates’ perceptions of how they were affected by these experiences.

1. Let’s start with you telling me a bit about your research experience. What did you do in your project? Who supervised you while you did your research?
2. We are especially interested in problematic or negative mentoring experiences students have during undergraduate research because the positive aspects are well documented. You rated the mentoring you experienced as less than ideal. Was there a particular person you had in mind or were you thinking about the mentoring you received in general?
3. What made your relationship with this individual / the mentoring you experienced negative or problematic?
4. What qualities, characteristics, and/or attitudes of the individual / the mentoring that made the situation negative or problematic?
5. Were there any specific situations that made your relationship with the individual negative or problematic?
6. Did you or the individual try to address these issues? If so, how? And how successful was that? If not, why not?
7. How did these negative or problematic aspects of the mentoring you experienced affect you?
8. Did you find your research experience to be worthwhile despite your mentoring experience? Please explain.
9. Is there anything that you think would be helpful for us to know about your experience?
10. Do you have any questions you have for me?
